# Supplementary material for: Toward interprofessional team training for surgeons and anesthesiologists using virtual reality
Source: Springer Nature journal article supplement (doi:10.1007/s11548-020-02276-y), 2020-10-20
Supplement: MOESM1 [file 18503850]

**Table 1** The average rate on five-point Likert scale and related items from cooperative social presence questionnaire [1]

|                                                                                             | <b>Mean (SD)</b>   |
|---------------------------------------------------------------------------------------------|--------------------|
| <b>Team Identification</b>                                                                  | <b>4.13 (0.64)</b> |
| Q1. I acted with my teammates in mind                                                       | 3.67 (0.58)        |
| Q2. I considered my teammates possible plans/thoughts                                       | 4.00 (1.00)        |
| Q19. I felt a social connection to my teammates (camaraderie)                               | 4.00 (0.00)        |
| Q21. I felt like I was part of a team                                                       | 4.33 (0.58)        |
| Q23. I was aware of my team                                                                 | 4.67 (0.58)        |
| <b>Social Action</b>                                                                        | <b>4.08 (0.83)</b> |
| Q6. I felt my teammates were looking out for me                                             | 3.00 (1.00)        |
| Q7. I felt I contributed to the team                                                        | 4.67 (0.58)        |
| Q8. I felt my actions made a difference to my teammates                                     | 4.67 (0.58)        |
| Q11. The actions of my teammates affected my thoughts and actions                           | 4.67 (0.58)        |
| Q13. My team communicated well                                                              | 3.33 (0.58)        |
| Q14. The team had a mutual understanding                                                    | 4.00 (0.00)        |
| Q16. My teammates played a significant role in my experience of the simulation <sup>1</sup> | 4.33 (0.58)        |
| Q25. I felt the team helped me                                                              | 4.00 (1.00)        |
| <b>Motivation</b>                                                                           | <b>4.06 (1.06)</b> |
| Q5. I did not want my team to think I had let them down                                     | 3.33 (1.53)        |
| Q9. My actions were determined by the objectives of the team                                | 5.00 (0.00)        |
| Q12. Being part of a team motivated me                                                      | 4.00 (0.00)        |
| Q15. I put the performance of the team over my personal performance                         | 4.00 (1.73)        |
| Q17. I wanted my team to value me                                                           | 3.67 (1.15)        |
| Q18. I felt responsible for achieving the objectives of the team                            | 4.33 (0.58)        |
| <b>Team Value</b>                                                                           | <b>4.44 (0.70)</b> |
| Q3. It was as much about the team as about my own game                                      | 4.00 (1.00)        |
| Q4. I felt my team shared a common overall aim                                              | 5.00 (0.00)        |
| Q10. I felt my team was committed to working together                                       | 4.67 (0.58)        |
| Q20. I made an effort to work with my teammates                                             | 4.33 (0.58)        |
| Q22. I felt my team shared common short term goals                                          | 4.67 (0.58)        |
| Q24. My teammates were useful                                                               | 4.00 (1.00)        |

## References

1. Hudson M, Cairns P (2014) Measuring social presence in team-based digital games. *Interacting with Presence: HCI and the Sense of Presence in Computer-Mediated Environments* pp 83–101

---

<sup>1</sup> Revised item (Change the word game to simulation)
